# Supplementary material for: Stomatal clustering in Begonia improves water use efficiency by modulating stomatal movement and leaf structure
Source: PubMed Central journal article supplement (PMC10168073; doi:10.1002/pei3.10086), 2022-07-04
Supplement: PEI3-3-141-s001.pdf [file PEI3-3-141-s001.pdf]

## Supplemental materials for

### Stomatal clustering in *Begonia* improves water use efficiency by modulating stomatal movement and leaf structure

Meng-Ying Tsai<sup>1,2</sup>, Chi Kuan<sup>1</sup>, Zheng-Lin Guo<sup>1</sup>, Hsun-An Yang<sup>2</sup>, Kuo-Fang Chung<sup>2\*</sup>, Chin-Min Kimmy Ho<sup>1\*</sup>

<sup>1</sup> Institute of Plant and Microbial Biology, Academia Sinica, Taipei, Taiwan

<sup>2</sup> Research Museum and Herbarium (HAST), Biodiversity Research Center, Academia Sinica, Taipei, Taiwan

\*Author for correspondence

#### This PDF file includes

Supplemental Figure 1 to 3

Supplemental Table 1

Supplemental References

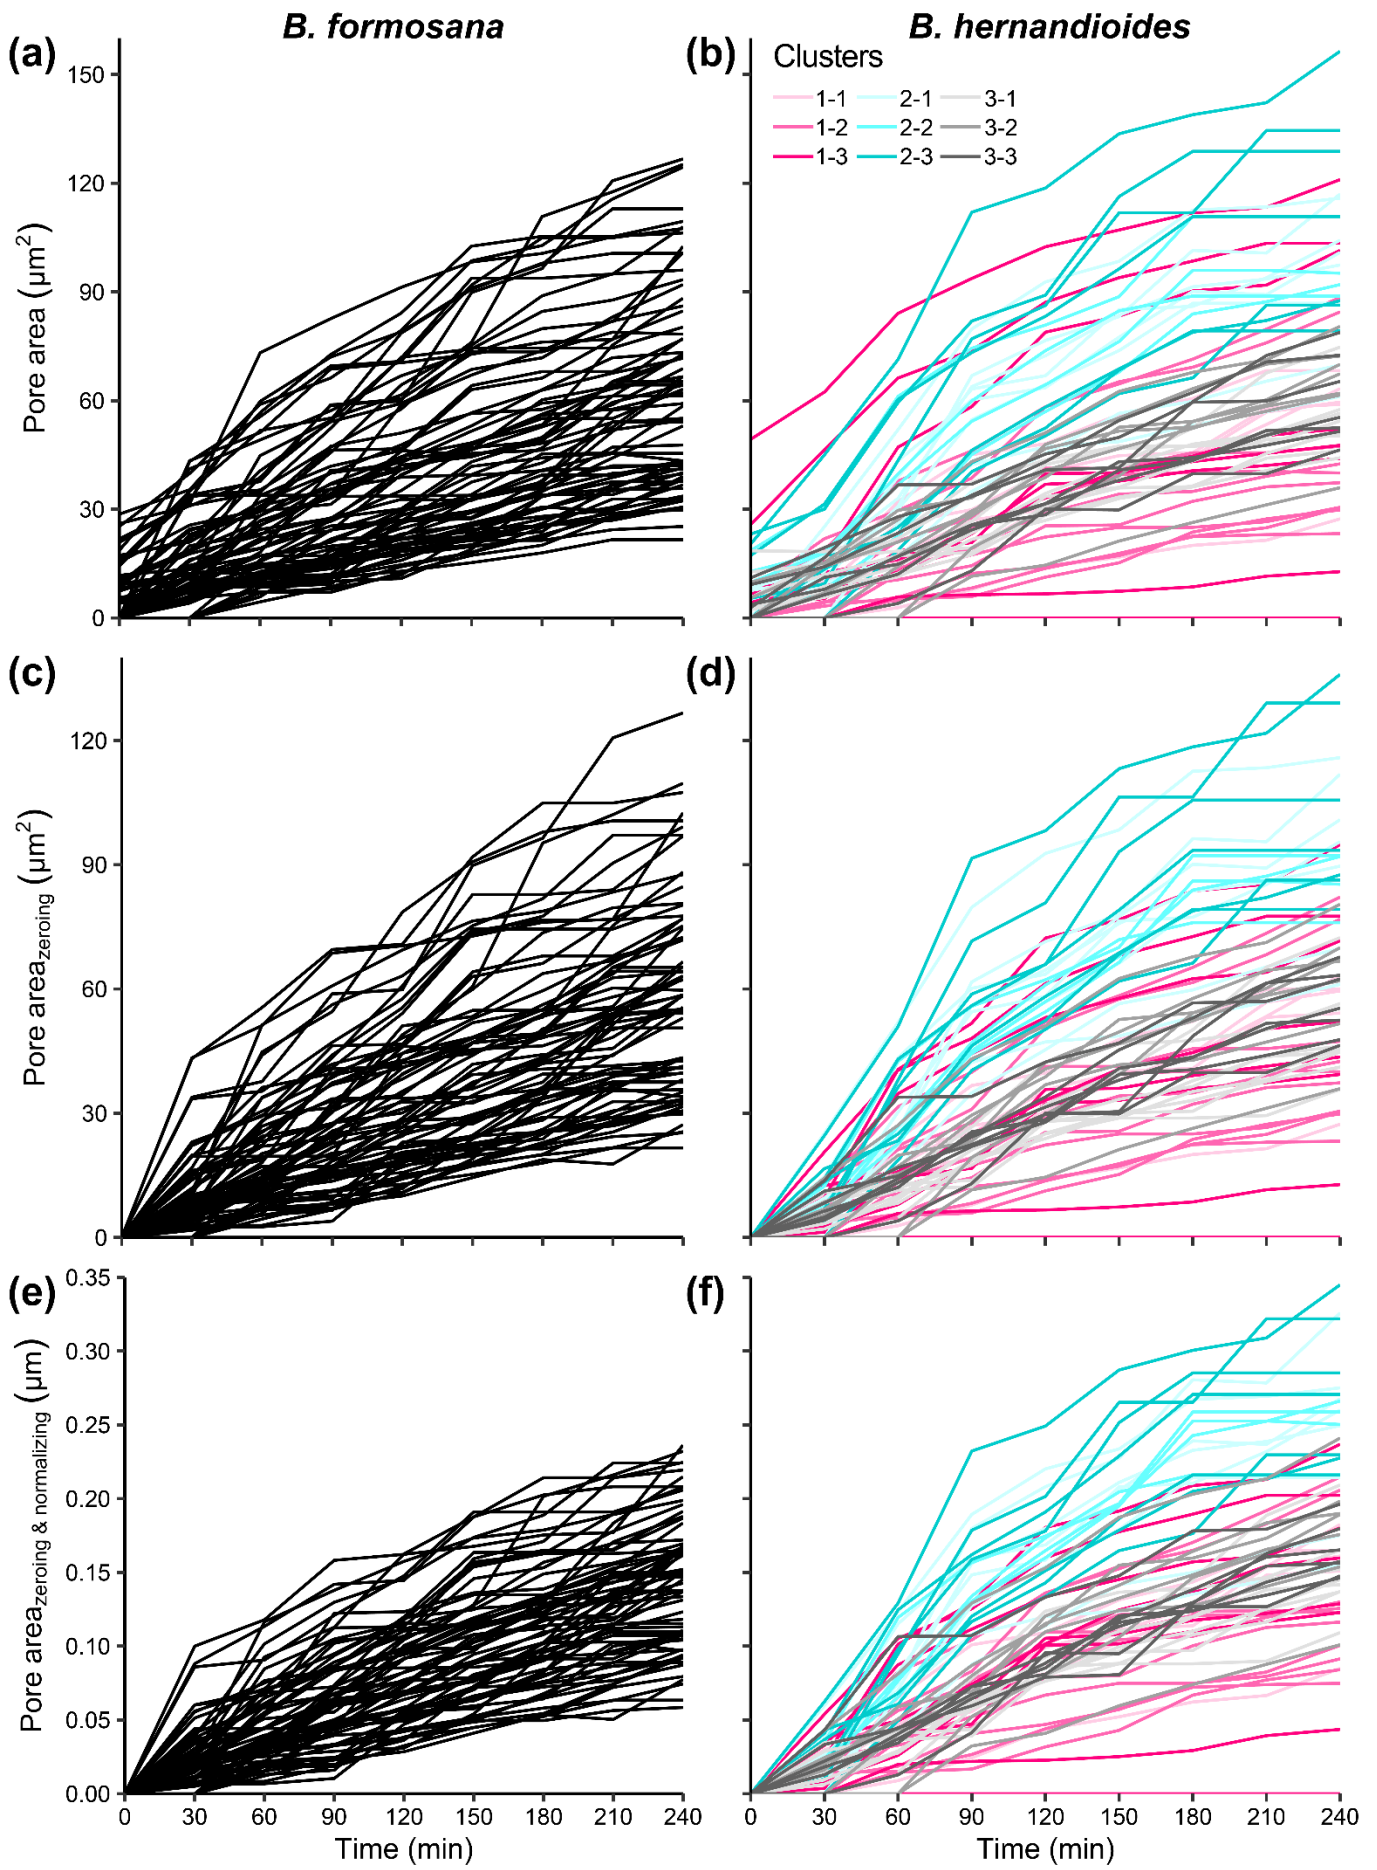

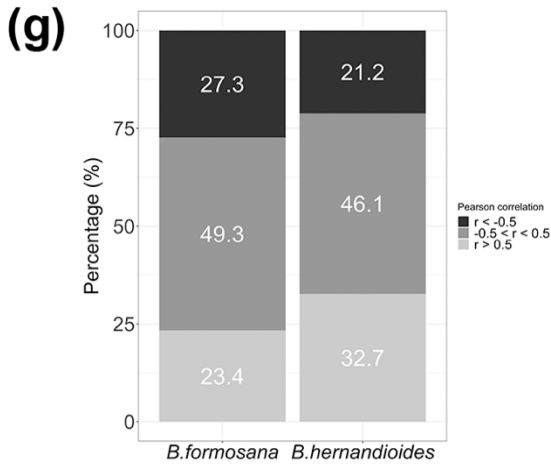

**Figure S1.** Response of pore area from 0 to 240 min under an irradiance of  $100\text{--}200 \mu\text{mol}\cdot\text{m}^{-2}\cdot\text{s}^{-1}$  in opening buffer.

(a and b) Raw data from changes in pore area from 0 to 240 min under an irradiance of  $100\text{--}200 \mu\text{mol}\cdot\text{m}^{-2}\cdot\text{s}^{-1}$  in *B. formosana* (a) and *B. hernandioides* (b).

(c and d) Pore area subtracted by the pore area at the starting point (0 min) (zeroing) in *B. formosana* (c) and *B. hernandioides* (d).

(e and f) Normalized data after zeroing and normalization by the maximum length of each stomate in *B. formosana* (e) and *B. hernandioides* (f).

(g) Pearson's correlation coefficients ( $r$ ) for pairwise comparisons between individual opening dynamics from 30 to 150 minutes using three individuals from *B. formosana* and individuals #1 and #3 from *B. hernandioides*. There were more positive correlations in *B. hernandioides* than in *B. formosana*.

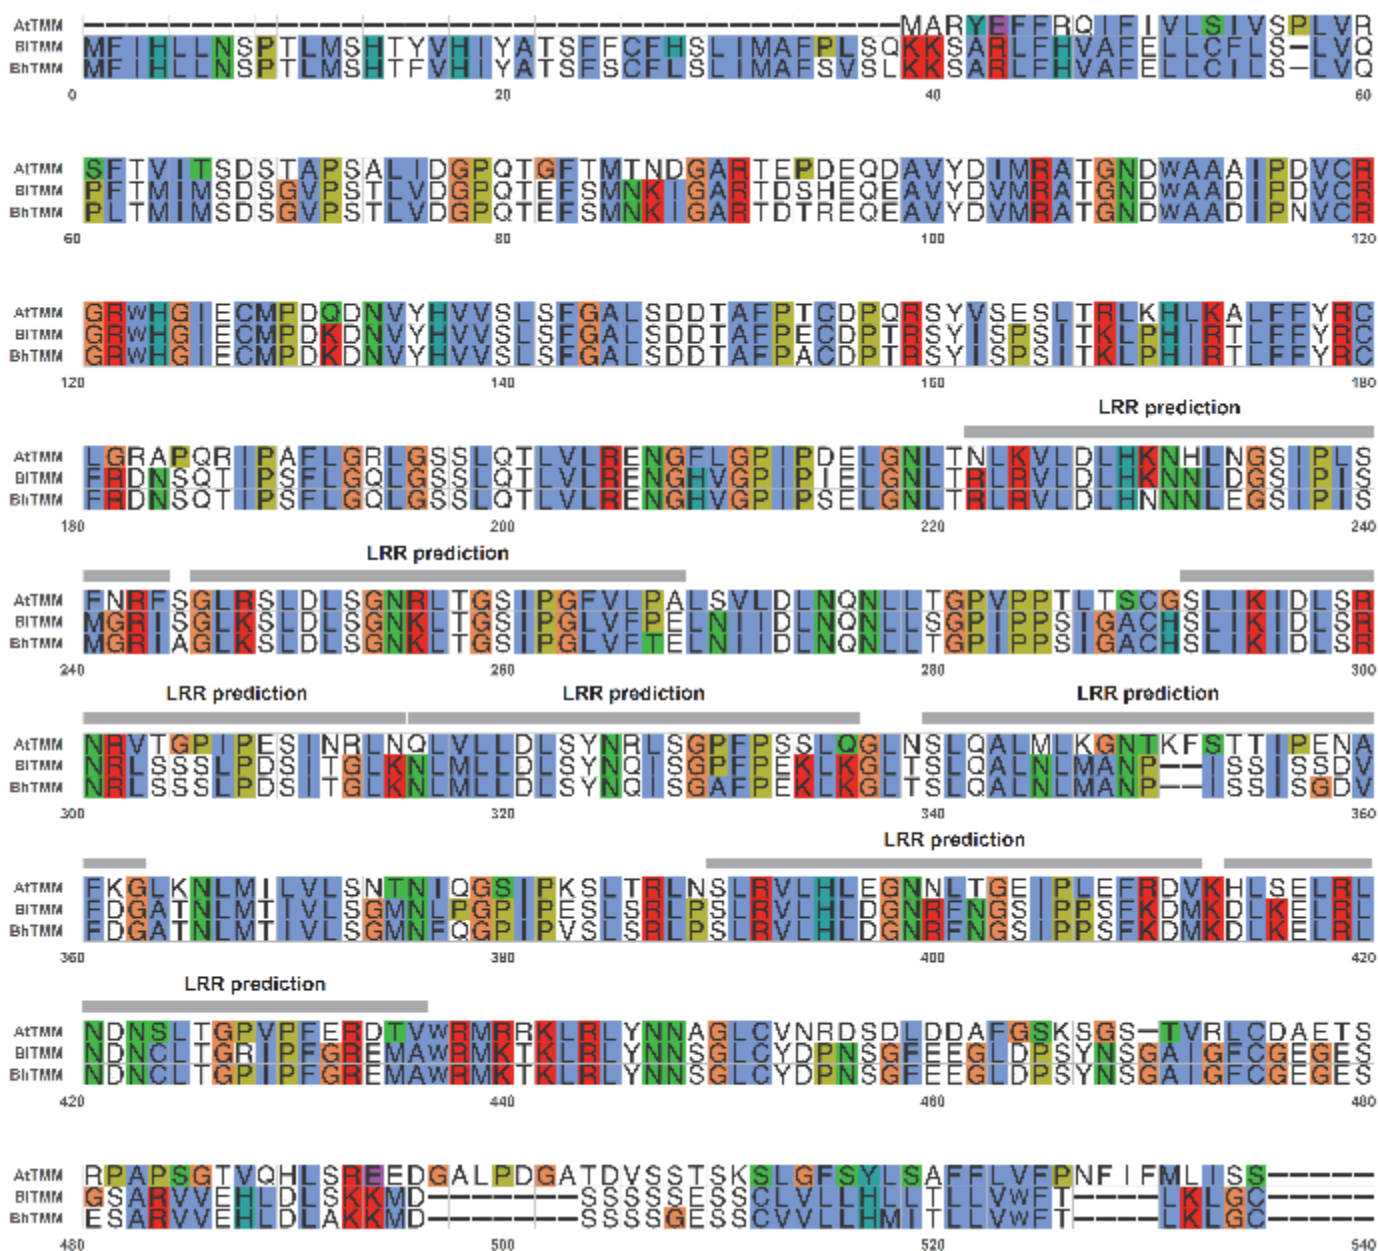

1

2 **Figure S2.** Amino acid alignment of AtTMM, BITMM, and BhTMM.

3 *Begonia* TMM (521 amino acids) is longer than *Arabidopsis* TMM (496 amino acids). The alignments were

4 performed with the CRAN Package *ggmsa* (<https://CRAN.R-project.org/package=ggmsa>) in R version 4.0.3.

5 Color patches were based on the ClustalX color scheme. Leucine-rich repeat (LRR) domains were predicted

6 using the PROSITE database (50).

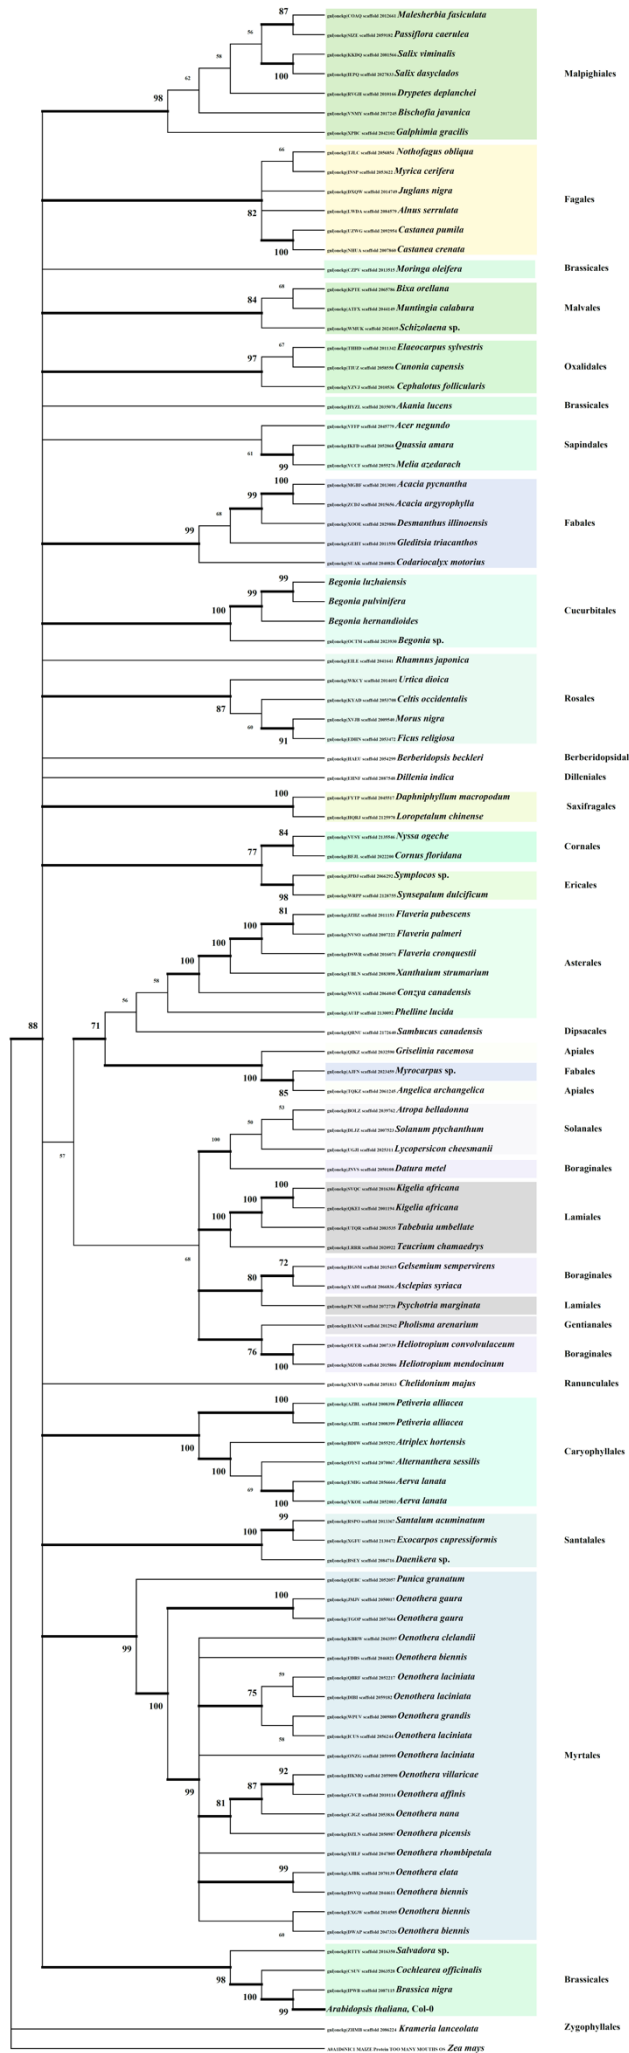

8 **Figure S3.** The optimal tree of TMMs was shown using the Neighbor-Joining method (Saitou & Nei, 1987).  
9 This analysis involved 105 amino acid sequences. The percentage of replicate trees in which the associated  
0 taxa clustered together in the bootstrap test (1000 replicates) are shown next to the branches (Felsenstein,  
1 1985). For Condensed tree, Cut-off value is set to BS = 50%. Bootstrap Support (BS)  $\geq$  70% were shown in  
2 bold types and lines. Most TMMs with strong support (BS > 70 %) in order-level represented similar  
3 phylogenetic relationships within orders; however, phylogenetic relationships among orders could not be  
4 confidently resolved with weak support (BS < 70%). The evolutionary distances were computed using the  
5 JTT matrix-based method (Jones *et al.*, 1992) and are in the units of the number of amino acid substitutions  
6 per site. All positions with less than 50% site coverage were eliminated (partial deletion option). There were  
7 a total of 455 positions in the final dataset. Evolutionary analyses were conducted in MEGA X (Kumar *et*  
8 *al.*, 2018).

**Table S1.** Parameters of gas exchange.

Net CO<sub>2</sub> assimilation rate ( $A$ ,  $\mu\text{mol m}^{-2} \text{s}^{-1}$ ), stomatal conductance ( $g_s$ ,  $\text{mol H}_2\text{O m}^{-2} \text{s}^{-1}$ ), and transpiration rate ( $E$ ,  $\text{mmol H}_2\text{O m}^{-2} \text{s}^{-1}$ ) under three light intensities in *B. formosana* (solitary stomata) and *B. hernandioides* (clustered stomata) ( $n = 3$  biological replicates). No significant differences were detected between the two *Begonia* species, as determined by Student's *t*-test.

| Parameters                                              | PPFD<br>( $\mu\text{mol m}^{-2} \text{s}^{-1}$ ) | Species             |                         |
|---------------------------------------------------------|--------------------------------------------------|---------------------|-------------------------|
|                                                         |                                                  | <i>B. formosana</i> | <i>B. hernandioides</i> |
| $A$ ( $\mu\text{mol m}^{-2} \text{s}^{-1}$ )            | 25                                               | $1.41 \pm 0.25$     | $1.35 \pm 0.17$         |
|                                                         | 100                                              | $2.93 \pm 0.54$     | $3.02 \pm 0.35$         |
|                                                         | 200                                              | $3.19 \pm 0.61$     | $3.96 \pm 0.81$         |
| $g_s$ ( $\text{mol H}_2\text{O m}^{-2} \text{s}^{-1}$ ) | 25                                               | $0.05 \pm 0.02$     | $0.03 \pm 0.02$         |
|                                                         | 100                                              | $0.04 \pm 0.01$     | $0.03 \pm 0.00$         |
|                                                         | 200                                              | $0.04 \pm 0.01$     | $0.04 \pm 0.01$         |
| $E$ ( $\text{mmol H}_2\text{O m}^{-2} \text{s}^{-1}$ )  | 25                                               | $0.52 \pm 0.16$     | $0.30 \pm 0.18$         |
|                                                         | 100                                              | $0.42 \pm 0.08$     | $0.29 \pm 0.05$         |
|                                                         | 200                                              | $0.45 \pm 0.11$     | $0.41 \pm 0.13$         |

**Felsenstein J. 1985.** Confidence limits on phylogenies: an approach using the bootstrap. *evolution* **39**(4): 783-791.

**Jones DT, Taylor WR, Thornton JM. 1992.** The rapid generation of mutation data matrices from protein sequences. *Bioinformatics* **8**(3): 275-282.

**Kumar S, Stecher G, Li M, Knyaz C, Tamura K. 2018.** MEGA X: molecular evolutionary genetics analysis across computing platforms. *Molecular biology and evolution* **35**(6): 1547.

**Saitou N, Nei M. 1987.** The neighbor-joining method: a new method for reconstructing phylogenetic trees. *Molecular biology and evolution* **4**(4): 406-425.
